**Examining the relationship between psychosocial adversity and inhibitory control: an fMRI study of children growing up in extreme poverty**

Zoya Surani<sup>1</sup>, Ted K Turesky<sup>1</sup>, Eileen Sullivan<sup>2</sup>, Talat Shama<sup>3</sup>, Rashidul Haque<sup>3</sup>, Nazrul Islam<sup>4</sup>, Shahria Hafiz Kakon<sup>3</sup>, Xi Yu<sup>5</sup>, William A Petri<sup>6</sup>, Charles Nelson III<sup>2,7</sup>, Nadine Gaab<sup>1</sup>

<sup>1</sup> Harvard Graduate School of Education, Cambridge, MA

<sup>2</sup> Laboratories of Cognitive Neuroscience, Division of Developmental Medicine, Department of Medicine, Boston Children's Hospital, Boston, MA

<sup>3</sup> Infectious Diseases Division, International Centre for Diarrheal Disease Research, Bangladesh

<sup>4</sup> National Institute of Neuroscience and Hospital, Dhaka, Bangladesh

<sup>5</sup> State Key Laboratory of Cognitive Neuroscience and Learning, Beijing Normal University, Beijing, China

<sup>6</sup> Division of Infectious Diseases and International Health, Department of Medicine, School of Medicine, University of Virginia, Charlottesville, VA

<sup>7</sup> Department of Pediatrics, Harvard Medical School, Boston, MA

Corresponding author: Nadine Gaab, [nadine\\_gaab@gse.harvard.edu](mailto:nadine_gaab@gse.harvard.edu)

Postal address: Gaab Lab, 50 Church St, Cambridge, MA 02138

## **ABSTRACT**

Exposure to psychosocial adversity (PA) is associated with poor behavioral, physical, and mental health outcomes in adulthood. Growing evidence suggests that deficits in executive functions may in part moderate these outcomes, with inhibitory control as an example of such a putative moderator. However, much of the literature examining the development of inhibitory control has been based on children in higher resource environments, and little is known how growing up in a low resource setting might exacerbate the link between inhibitory control and health outcomes. In this context we collected fMRI data during a Go/No-Go inhibitory control task and PA variables for 68 children 5 to 7 years of age living in Dhaka, Bangladesh, an area with a high prevalence of PA. The children's mothers completed behavioral questionnaires to assess the child's PA and their own PA. Whole-brain activation underlying inhibitory control was examined using the No-Go versus Go contrast, and associations with PA variables were assessed using whole-brain regressions. Childhood neglect was associated with weaker activation in the right posterior cingulate, whereas greater family conflict, economic stress, and maternal PA factors were associated with greater activation in the left medial frontal gyrus, right superior and middle frontal gyrus, and left cingulate gyrus. These data suggest that neural networks supporting inhibitory control processes may vary as a function of exposure to different types of PA, particularly between those related to threat and deprivation. Furthermore, increased activation in children with greater PA may serve as a compensatory mechanism, allowing them to maintain similar behavioral task performance.

**Keywords:** Early adversity, functional MRI, executive function, inhibitory control, cognitive development, poverty

## **INTRODUCTION**

Globally, more than six out of ten adults have been exposed to at least one adverse childhood experience (ACE), while one out of six adults have been exposed to at least four ACEs (Madigan et al., 2023). ACEs are typically described using three categories: abuse, neglect, and household dysfunction (Felitti et al., 1998). ACEs are used as a measure of the psychosocial adversity (PA) an individual has been exposed to before the age of 18 (Felitti et al., 1998). Individuals who experienced PA in childhood or who were exposed to mothers experiencing PA during this time are found to have increased behavioral, emotional, and academic problems, including increased risk taking, aggressive behavior, and psychopathology, as well as poorer academic achievement (Bick & Nelson, 2016; El-Khodary & Samara, 2020; Lansford et al., 2002). As PA acts as a severe stressor, exposure to PA produces various physiological and behavioral changes, which can also lead to alterations in developmental processes that can be seen through changes in brain structure, function, and connectivity (Bick & Nelson, 2016; Sheridan et al., 2012; Teicher et al., 2003). There has been recent interest in determining the underlying mechanism that links PA to brain alterations and negative outcomes in adulthood. Through considering the alterations that occur in developmental processes as a result of exposure to PA, a proposed factor involves impaired inhibitory control—a facet of executive functioning (EF) (Wu et al., 2021; Zelazo, 2020; Pechtel & Pizzagalli, 2011). This is an important relationship to consider as understanding the mechanism for which PA relates to psychopathology can better inform interventions in populations with high PA.

### **Inhibitory Control**

Inhibitory control is one aspect of EF—a set of higher-order cognitive processes (Perone et al., 2018). Inhibitory control focuses on the ability of an individual to control their impulses by suppressing behavioral habits to make decisions, and can serve as a predictive measure of academic and professional outcomes (Diamond, 2013; Perone et al., 2018; Mann et al., 2017;

Kang et al., 2022). In addition to its role in decision-making, inhibitory control is utilized in verbal communication, reading and mathematical skills, memory retrieval, and problem-solving, thus its development in individuals is of particular interest when considering how adulthood outcomes may be affected (Xu et al., 2020).

Inhibitory control has been noted to emerge during infancy, but develops most rapidly between ages 4-6, with further development after this age relating to refinement of inhibitory control networks (Kang et al., 2022; Lee et al., 2015; Liu et al., 2015; Cragg & Nation, 2008). When assessing inhibitory control in various populations, there are notable age-related differences from childhood to adulthood for increase in accuracy and speed in task performance and development of brain networks/activation patterns (Cragg & Nation, 2008; Tamm et al., 2002).

When considering the brain activation patterns, inhibitory control represents a broadly distributed network with the prefrontal cortex as the hub, and more distal sites serving as nodes within this network (Perone et al., 2018). One task that has been commonly used to assess inhibitory control is the Go/No-Go (GNG) task, where participants respond to one stimulus and inhibit their response to a different stimulus. The GNG task is commonly used in fMRI studies, as it is a relatively simple task, and many trials can be completed in a short amount of time to note functional and task-based changes. From fMRI meta-analyses of studies that use the GNG task, brain activation in the prefrontal regions, caudate, cingulate, insula, and parietal cortex were commonly found, primarily in adults (Perone et al., 2018; Simmonds et al., 2008). While inhibitory control has not been extensively studied in young children, previous studies have found greater cortical activation directly related to performance in children compared to adults—reflective of immature prefrontal functioning in children which requires greater activation most likely as a compensatory mechanism (Casey et al., 1997; Lesnik, 2007). Additionally, children's activation (6-12 years of age) has been observed to be more posterior than adults and less focal (e.g., more widespread area of activation) (Bunge et al., 2002; Lesnik, 2007; Rubia et al., 2003). It is important to note that the few studies conducted on children focused on high-income areas, thus the brain

correlates of inhibitory control in children growing up in extreme poverty are still unknown. Understanding the neural correlates of inhibitory control in children in low-resourced areas is important, as poverty and factors related to poverty, including PA, can impact inhibitory control development (Pechtel & Pizzagalli, 2011; Wu et al., 2021).

### **Relationship between PA Exposure in Childhood and Inhibitory Control**

Childhood PA factors have been extensively researched in how they impact children's growth and development, with inhibitory control commonly assessed alongside to understand how key skills are affected (Felitti et al., 1998; Lund et al., 2020). While exposure to PA has been linked to increased psychopathology, neurodevelopmental models highlight disruption of appropriate EF development, which includes inhibitory control, as a possible mechanism for these outcomes (Zelazo, 2020).

When considering childhood PA factors, particularly maltreatment, most studies have reported greater exposure to PA associated with poorer inhibitory control behavioral outcomes, however some studies reported a lack of significant findings (Carvalho et al., 2020; Lund et al., 2020; Augusti & Melinder, 2013). In light of varying results, rather than considering the cumulative effects of PA as previously done, greater attention is aimed at characterizing and identifying the impacts of the specific forms of adversity as they can manifest in different ways in a developing brain (Felitti et al., 1998; Schäfer et al., 2023). When various types of adversity are assessed as a single factor, developmental differences that may relate to these types of PA are unable to be distinguished whereas these factors may affect brain development differently if they were considered individually (McLaughlin, 2016; Schäfer et al., 2023).

For this reason, PA factors can be categorized into two different components: 'threat' and 'deprivation', where threat includes those that involve exposure to a negative stimulus (e.g., abuse, witnessing or exposure to violence) and deprivation involves those that relate to the absence of an input that is expected in environments to promote development (e.g., neglect)

(Schäfer et al., 2023). While threat is expected to have greater associations with impairment in emotional processing, deprivation is more likely related to inhibitory control impairment at a complex cognitive level (Johnson et al., 2021; Schäfer et al., 2023). When considering the nature of the impact of threat, exposure to threat in childhood relates to changes in brain function, particularly the hippocampus and amygdala, due to extensive activation of the hypothalamic-pituitary-adrenal (HPA) axis and maintained detection of heightened stress (Ivy et al., 2010; McLaughlin, 2016; van Marle et al., 2009). These activation changes in the HPA axis can also relate to altered development of the prefrontal cortical circuitry which impacts development of cognitive processes (Merz et al., 2023). Deprivation in childhood, however, is more likely directly associated with cortical changes in the brain, including reductions in dendritic arborization and cortical thickness, impacting the ability to process complex social and cognitive inputs (McLaughlin, 2016; Hildyard & Wolfe, 2002). Due to overlap between the categories of adversity, however, the expected outcomes are not exclusive. For example, when considering the relationship between PA and inhibitory control, it is possible that both threat and deprivation result in decreased behavioral performance and reduced brain activation patterns in EF networks, though deprivation would be expected to have greater reductions in these networks activity due to its direct relationship with cortical changes (Johnson et al., 2021).

As a result, from a neuroimaging perspective, this relationship between PA and inhibitory control has yielded varying results (Kraaijevanger et al., 2020). Overall, researchers have observed that exposure to various forms of PA has been observed to be associated with decreased activation in key inhibitory control regions, particularly in the anterior cingulate cortex, prefrontal/frontal cortex, and inferior parietal lobule, relating to impaired performance during inhibitory control tasks (Cará et al., 2019; Simmonds et al., 2008; You & Lim, 2015). When considering brain activation patterns between individuals with and without PA exposure who have the same performance in inhibitory control tasks, differing activation patterns are still observed (Bruce et al., 2013; Jankowski et al., 2017; Ma et al., 2012). More specifically, some researchers

have reported decreased activation in task-related areas (e.g., anterior cingulate cortex, middle frontal gyrus) while others have shown increased activation globally, as well as in more posterior regions (e.g., left inferior frontal cortex, right inferior temporal cortex, middle occipital cortex, cerebellum) (Bruce et al., 2013; Ma et al., 2012). It is important to note that as some children exhibit these patterns of increased diffuse activation during the inhibitory control task when there are no significant differences in behavioral performance, one explanation posited is related to compensatory strategies (Ma et al., 2012). It is possible that this greater activation relates to the brain's ability to increase activity in task-related areas and recruit additional areas to compensate and maintain similar behavioral performance (Ma et al., 2012; Soloveva et al., 2020).

### **Relationship between Maternal PA Exposure and Inhibitory Control**

Maternal PA, particularly related to mother's mental health and wellbeing are often used as indicators of stress the child is exposed to in their early environment. In particular, maternal depressive symptoms experienced during early childhood (ages 0 to 6) predicted the child's difficulties with inhibitory control at later ages (Baker & Kuhn, 2018; Hughes et al., 2013; Wang & Dix, 2017). Reduction of maternal depressive symptoms were also observed to be associated with restoration of EF deficits, i.e. higher EF (Lund et al., 2020). Additionally, positive parenting practices (e.g., warmth and sensitivity toward children) have been associated with lower inhibitory control network connectivity—which is associated with maturation of higher-order networks (Pozzi et al., 2021). It is hypothesized that exposure to maternal stress not only impacts the hypothalamic-pituitary-adrenal axis resulting in increased cortisol secretion (i.e., stress response) and impacts to prefrontal cortical circuitry, but as it can be related to lower levels of maternal sensitivity and care, it can impact social and cognitive networks more directly as well (e.g., those related to inhibitory control) (Gonzalez et al., 2012; Bernier et al., 2010; Saridjan et al., 2010; Merz et al., 2023).

Though maternal stress and depression impacts on children's inhibitory control have been examined from a behavioral level, the impacts on children's neural substrates of inhibitory control remain largely unexplored. Further, the existing research that explores the relationship between PA and inhibitory control through neuroimaging, relies mostly on adults and adolescents, particularly with populations in high-income areas. Research conducted outside of the early childhood years is unable to consider the early brain networks that occur as the preschool period is a period of rapid inhibitory control maturation (Lee et al., 2015; Liu et al., 2015). Finally, understanding how this relationship manifests in low-resource environments is largely necessary to understand how this relationship manifests in areas with a high prevalence of PA. In a recent study that compared the neural correlates of inhibitory control through EEG and ERP in Dhaka, Bangladesh as part of the Bangladesh Early Adversity Neuroimaging (BEAN) study, it was found that children with greater early adversity had lower accuracy, lower IQ, and children in this area also had notable neural differences (e.g., more pronounced P3 amplitude in the inhibitory control condition) (Sullivan et al., 2022). As notable differences were found in this population using EEG and ERP neuroimaging tools, inherently, it is necessary to understand these changes through additional functional methods (e.g., fMRI).

### **The Current Study**

The purpose of the current study is to further build on evidence on the relationship between PA and the functional neuroanatomy of inhibitory control, specifically using fMRI data collected during the GNG task, in children 5 to 7 years of age in an environment with a high prevalence of extreme poverty in Dhaka, Bangladesh. In this area, 64% of families met the World Bank definition of extreme poverty, which includes families living on less than \$1.90 per day (Sullivan et al., 2022). These are important considerations, not only to understand if existing trends from research done in high- and middle-resource countries extend to low-resource countries where there is a greater prevalence of PA, but also to examine the brain function underlying the differences in inhibitory



control among children at an age where inhibitory control is developing rapidly. Understanding how this relationship manifests in an area of high poverty, particularly from a neuroimaging level, will allow for greater identification of the alterations that occur in developmental processes associated with exposure to PA.

We sought to examine this relationship and add to existing research through three main aims. First, we examined the neural basis of inhibitory control through fMRI in children living in a low-resource environment to determine whether previous activation patterns found are generalizable to our population. Despite the recent growth and progress in the developmental cognitive neuroscience field, few studies have been conducted in cultural and contextual environments that extend from the traditional Western, educated, industrialized, rich, and democratic (WEIRD) societies (Garcini et al., 2022). By examining how activation patterns from our sample compare to those observed in prior research (e.g., activation in the prefrontal cortex, cingulate; widespread areas of activation in superior and middle frontal gyri), a new perspective of brain development will be added.

Second, we assessed whether inhibitory control activation varied with exposure to PA. Specifically, we performed regression analyses to determine how activation patterns in the inhibitory control contrast were related to children's exposure to specific types of PA as well as a cumulative measure (combining the individual PA factors). Finally, we determined how activation patterns for inhibitory control differ between children with varying exposure to maternal PA. When considering the role of PA, we hypothesize that children who experienced greater PA, childhood and/or maternal, particularly in the cumulative measures, would have inefficient recruitment of task-related areas, including decreased activation in key inhibitory control areas, including the parietal and prefrontal cortices, as well as the anterior cingulate, as shown in Kraaijenvanger et al. (2020), Cará et al. (2019), and Bruce et al. (2013). When considering specific PA factors, we hypothesize that those related to deprivation (e.g., neglect, social isolation) would more likely have greater observable differences in activation patterns than those related to threat (Johnson

et al., 2021; Schäfer et al., 2023). As a compensation mechanism for individuals with similar performance but differing levels of PA, we hypothesize that there may be increased activation globally as observed by Bruce et al. (2013) and Ma et al. (2012). Successful completion of these goals will help characterize the neural correlates of inhibitory control in children in a low-resource environment and identify how activation between EF-related regions are altered in children with exposure to PA.

## **METHODS**

### **Participants**

The participants' data used for this project are from a larger study, the Bangladesh Early Adversity Neuroimaging (BEAN) Study. The BEAN study aims to understand the relationship between biological adversity and psychosocial adversity (PA) and neurocognitive development in children in Dhaka, Bangladesh. Participants were recruited from a medical clinic in the Mirpur area of Dhaka. All children included in the study were born at greater than 34 weeks gestation and had no history of neurological abnormalities/traumatic brain injury, known genetic disorders, and/or visual or auditory delays or impairments (Jensen et al., 2019).

Children were drawn from two cohorts: the Performance of Rotavirus and Oral Polio Vaccines in Developing Countries (PROVIDE) or the Cryptosporidium Burden Study (CRYPTO) cohorts. Children from the PROVIDE and CRYPTO cohorts were initially recruited as two separate groups, but as all children were from a low-resource environment, whose PA and fMRI data were collected in similar ways, their PA and MRI data were processed identically and combined into one group.

Whereas 260 children were included in the larger BEAN study, the current study includes a smaller subset due to challenges in fMRI and psychosocial questionnaire data collection as well as exclusion criteria used for the fMRI data (related to motion and in-scanner performance), further explained in fMRI Data Processing. The final sample of combined CRYPTO and PROVIDE cohorts included 68 children (34 M, 34 F), with an average age of 78.9 months (SD = 6.4, range = 61 – 84).

This study received ethical approval from research and ethics review committees at The International Centre for Diarrhoeal Disease Research, Bangladesh (ICDDR), and the Institutional Review Board at Boston Children's Hospital.

### **Psychosocial Adversity Measures**

### *Childhood PA*

When participants were 60 months of age, trained research assistants interviewed participants' mothers in order to complete a comprehensive behavioral battery to assess various PA measures, including the Childhood Psychosocial Adversity Scale (CPAS) (Berens et al., 2019), Edinburgh Postnatal Depression Scale (EPDS) (Gausia et al., 2007), Perceived Stress Scale (PSS) (Cohen et al., 1983), and Tension Scale (TS) (Karasz et al., 2013). The CPAS was a locally adapted parent-reported questionnaire that included 54 items rated on a scale of 0 (never) to 4 (always) grouped into nine subscales, to determine the child's exposure to different forms of adversity by assessing the frequency of adverse events (Berens et al., 2019). The CPAS subscales (Harsh Discipline and Abuse, Neglect, Caregiver Emotional Availability, Depression, Social Isolation, Physical Intimate Partner Violence, Verbal Abuse and Family Conflict (Family Conflict), Household Economic Stress, and Community Adversity) were used as individual measures and as a summed measure (CPAS Scaled) according to the scale's indicated grading (Berens et al., 2019). The average childhood PA summary score was  $7.34 \pm 4.46$ . Additional descriptive statistics of childhood PA measures are included in the Supplementary Material (Table 1).

### *Maternal PA*

In addition to the CPAS, the EPDS, PSS, and TS, were collected to assess maternal mental health and wellbeing. The EPDS was previously validated in Bangladesh (Gausia et al., 2007), whereas the PSS was translated, back-translated, and pretested in Bengali with experts and field populations as part of the BEAN study (Sullivan et al., 2022). The TS was designed specifically for this population and was used without any changes (Karasz et al., 2013). The three questionnaires were used as individual measures as well as a simple sum score to analyze the relationship between specific types of PA in addition to a total PA exposure value. The average maternal PA summary score was  $49.66 \pm 17.22$ . Additional descriptive statistics of maternal PA measures are included in the Supplementary Material (Table 2).

## Go/No-Go Task Paradigm

An event-related Go/No-Go (GNG) task was used to identify brain correlates of inhibitory control, one facet of executive functioning. This task was modeled after the GNG task used by Langer et al. (2019) but as Bangladeshi children were less familiar with the images of crabs initially used as stimuli, these images were replaced. Children were instead presented with either an image of a rooster or an image of a chick and told to respond as quickly as possible when the rooster appeared (Go condition) and refrain from responding when the chick appeared (No-Go condition). The task included a practice run, which occurred outside the scanner to ensure the participants understood the task design, and three experimental runs in the scanner. The practice run had a minimum of 30 trials and variable percentages of “Go” and “No-Go” stimuli between participants, while the three experimental runs each contained 80 trials with 75% of the stimuli presented being “Go” stimuli and 25% of the stimuli presented being “No-Go” stimuli. The “Go” stimuli did not appear more than three times in a row, and the “No-Go” stimuli did not appear more than two times in a row. Additionally, each run began with a “Go” stimulus. Each stimulus was displayed for 100 ms and was followed by an interstimulus fixation interval. The interstimulus fixation screen was displayed for between 100 ms and 900 ms and was when participants responded by pushing (or refraining from pushing) a button on a simple button remote. A representation of the task design is included in Figure 1.

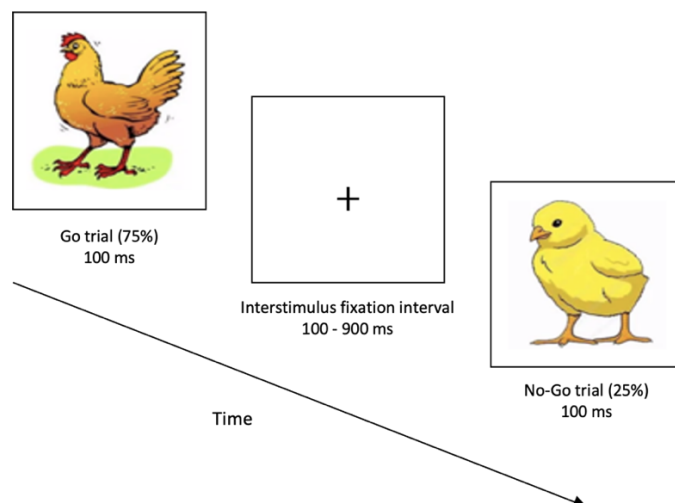

### **Figure 1: Go/No-Go task design**

This figure depicts the task design for the GNG task used. The stimulus presentation was followed by the presentation of a fixation screen (which varied in length) in which the participant responded. After the fixation interval, a new stimulus would appear. When the rooster stimuli appeared, children were asked to respond by pressing a button, whereas when the chick stimuli appeared, children were asked to refrain from responding.

### **MRI Data Acquisition**

Prior to the start of MRI scanning, local staff from the National Institute for Neuroscience and Hospital (NINSH) and ICDDRB in Dhaka, Bangladesh visited Boston Children's Hospital to receive training for conducting pediatric MRI. While the center had previously scanned pediatric patients for clinical and pilot studies, this training ensured staff were familiar with the requirements needed for this large-scale study. A protocol was designed that details this training and the limitations for conducting MRI in low-resource settings (Turesky et al., 2019).

As explained in Turesky et al. (2021), participants were scanned in a 3T Siemens MAGNETOM Verio scanner using a 12-channel head coil at the NINSH. Consent was obtained the day prior to the children's scanning. Before the children were scanned, they were shown various anatomical images of the brain to understand the function of the MRI scanner and were also able to familiarize themselves with a mock cardboard scanner and set of button controls.

Structural T1-weighted MPRAGE scans were acquired with the following parameters: TR = 2500 ms, TE = 3.47 ms, 176 sagittal slices, 1 mm<sup>3</sup> voxels, FOV = 256 mm. Gradient-echo echo-planar imaging acquisition was used to acquire 132 functional BOLD volumes with the following parameters: TR = 2000 ms, TE = 3.47 ms, 32 slices, interleaved, voxel dimensions 3 x 3 x 4.8 mm, and in-plane resolution of 64 x 64.

### **fMRI Data Processing**

#### *Preprocessing*

Image preprocessing and analyses were completed in SPM12. Preprocessing of the fMRI data included slice-time correction, realignment, coregistration, normalization, smoothing, and artifact removal. Coregistration aligned the participant's functional MRI images with their structural T1 MRI image. Normalization was performed with the CAT12 toolbox. Smoothing was done at FWHM = 8 mm and a motion threshold of 2 mm was set to remove the artifactual volumes from each participant's time series. Participants for whom 30% of their volumes were preceded by over 2 mm of head motion were removed from further analysis and the functional dataset.

### *Analysis*

For all participants who met accuracy (above 50% average) and motion requirements (preprocessing section above), the three experimental runs of the GNG tasks were combined in a fixed-effects model. A high-pass filter of 128 Hz was used to remove low-frequency noise before creating a multiple regression model. Regression analyses as part of first-level statistics were conducted on the processed functional time series to examine the activation over the time course. Regressors were modeled for the Go stimuli pressed and No-Go stimuli unpressed (correct trials). To account for head motion and changes in the global mean signal, we created a multiple regression model with six rigid-body parameters, a matrix specifying the artifactual volumes, and the global mean signal at each time point. Contrasts were generated for Go > Fixation (baseline), No-Go > Fixation, and No-Go greater than Go (NGvG) in individual subjects. The NGvG contrast was generated to visualize which regions underlie inhibitory control.

Second-level statistics involved combining individual brain maps to create group maps to visualize regions active in these contrasts. The height threshold used for the contrasts was  $p = 0.001$ . The FDR cluster-level corrected p-value was 0.05. Clusters of activation, peak intensities, peak coordinates, and loci in MNI space were ascertained using SPM12. MNI coordinates were then transformed into Talairach anatomical space (Talairach et al., 1988) using the `icbm2tal` algorithm within the GingerALE platform (Lancaster et al., 2007), and anatomical regions were labeled according to the Talairach Daemon (<http://www.talairach.org/daemon.html>).

## **Brain-Behavioral Analyses**

To understand the relationship between PA and children's inhibitory control, multiple regressions were run on a whole-brain level. Regressions were run on the NGvG contrast with the individual childhood PA measures (CPAS subscales), the individual maternal PA measures (EPDS, PSS, TS), and the sum childhood PA (CPAS Scaled) and maternal PA (Maternal Health Sum) scores listed as covariates of interest in separate models. Given that two cohorts were combined for these analyses, a covariate of no interest was added to distinguish the PROVIDE and CRYPTO cohorts.

Brain-behavioral analyses were used to determine if there was a statistically significant relationship between the PA variable and NGvG activation. Both positive and negative contrasts were examined to ensure that both positive and negative relationships between PA and activation subserving inhibitory control were considered. The height threshold used for brain-behavioral analyses was  $p = 0.001$ . The FDR cluster-level corrected p-value was 0.05.



## RESULTS

### Behavioral Results

After combining the accuracy values for participants ( $n = 68$ ) in the three Go/No-Go experimental runs, the average accuracy for the Go and No-Go runs were calculated. Similar to results from previous studies with this age group, the accuracy for the Go runs (89.7%,  $SD = 6.9$ ) was higher than for the No-Go runs (83.5%,  $SD = 12.0$ ) ( $p < 0.001$ ) (Sullivan et al., 2022; Torpey et al., 2012). The accuracy values exclude participants who performed with less than 50% accuracy, as these participants were removed from the final analysis.

Correlations were run between the accuracy values (Go accuracy, No-Go accuracy) and all childhood and maternal psychosocial adversity (PA) variables. No significant correlations were found between any of these measures.

### Neuroimaging Results

#### *Go/No-Go Contrasts: Group Maps*

Whole-brain maps were created for the Go > Fixation, No-Go > Fixation, and No-Go greater than Go (NGvG) contrasts. For the Go > Fixation contrast, significant activation clusters were found in the left medial frontal, and bilateral occipital, cerebellar, and inferior parietal regions. The peak in the large left medial frontal cluster extended into the right medial frontal, left pre- and postcentral gyri, and bilateral basal ganglia, thalamus, and insula areas. The No-Go > Fixation contrast revealed significant activation clusters in the right claustrum, left inferior parietal, and bilateral occipital, cingulate, and superior temporal areas. The peak in the right claustrum cluster extended into the bilateral insula, basal ganglia, and thalamus. The NGvG contrast revealed significant activation in the right superior frontal, left cerebellar, and bilateral insula, superior temporal, and basal ganglia areas. Right cerebellar, and bilateral cingulate and occipital regions were also active through extensions from other areas.

Table 1 includes the coordinates and details for each of the significant cluster peaks from the three contrasts. Figure 2 depicts the surface renderings of these areas.

**Table 1:** Locations of significant whole-brain activation cluster peaks for the Go, No-Go, and No-Go > Go contrasts.

|                                     | Region                       | BA | x      | y      | z      | k     | p <sub>FDR</sub> |
|-------------------------------------|------------------------------|----|--------|--------|--------|-------|------------------|
| <b>Go &gt; Fixation Contrast</b>    | L. Medial Frontal Gyrus      | 6  | -5.41  | -8.66  | 55.61  | 50321 | <0.001           |
|                                     | R. Culmen                    | *  | 13     | -44.64 | -19.55 | 11933 | <0.001           |
|                                     | L. Cuneus                    | 17 | -21.65 | -94.15 | -2.31  | 2108  | <0.001           |
|                                     | R. Inferior Occipital Gyrus  | 18 | 34.98  | -82.13 | -11.92 | 1882  | <0.001           |
|                                     | L. Cerebellum, Anterior Lobe | *  | -34.12 | -52.08 | -28.26 | 2890  | <0.001           |
|                                     | L. Inferior Parietal Lobule  | 40 | -53.51 | -57.59 | 38.45  | 500   | 0.011            |
|                                     | R. Inferior Parietal Lobule  | 40 | 45.4   | -49.74 | 50.78  | 755   | 0.002            |
| <b>No-Go &gt; Fixation Contrast</b> | R. Claustrum                 | *  | 29.52  | 18.22  | 10.11  | 31578 | <0.001           |
|                                     | R. Fusiform Gyrus            | 37 | 35.12  | -52.73 | -14.54 | 13086 | <0.001           |
|                                     | L. Cuneus                    | 18 | -25.36 | -93.29 | -1.39  | 9131  | <0.001           |
|                                     | L. Cingulate Gyrus           | 24 | -9.84  | 5.62   | 44.28  | 14641 | <0.001           |
|                                     | R. Superior Temporal Gyrus   | 21 | 50.83  | -26.49 | -4.58  | 5030  | <0.001           |
|                                     | L. Inferior Parietal Lobule  | 40 | -51.42 | -43.07 | 24.55  | 992   | 0.001            |
|                                     | R. Cingulate Gyrus           | 23 | 4.15   | -28.37 | 25.98  | 323   | 0.047            |
|                                     | L. Superior Temporal Gyrus   | 22 | -51.04 | -27.42 | -0.99  | 710   | 0.003            |
| <b>No-Go &gt; Go Contrast</b>       | R. Insula                    | *  | 30.55  | 20.78  | 3.16   | 32693 | <0.001           |
|                                     | L. Declive                   | *  | -34.3  | -56.18 | -15.14 | 13814 | <0.001           |
|                                     | L. Insula                    | *  | -30.53 | 21.09  | 2.16   | 7190  | <0.001           |
|                                     | R. Superior Frontal Gyrus    | 6  | 3.97   | 10.53  | 51.29  | 9074  | <0.001           |
|                                     | R. Superior Temporal Gyrus   | 21 | 50.81  | -27.6  | -2.88  | 3507  | <0.001           |
|                                     | L. Superior Temporal Gyrus   | 22 | -52.88 | -26.48 | -0.93  | 523   | 0.006            |
|                                     | R. Caudate                   | *  | 13.4   | -32.14 | 25.78  | 430   | 0.011            |
|                                     | L. Caudate                   | *  | -12.52 | -30.23 | 26.43  | 339   | 0.022            |

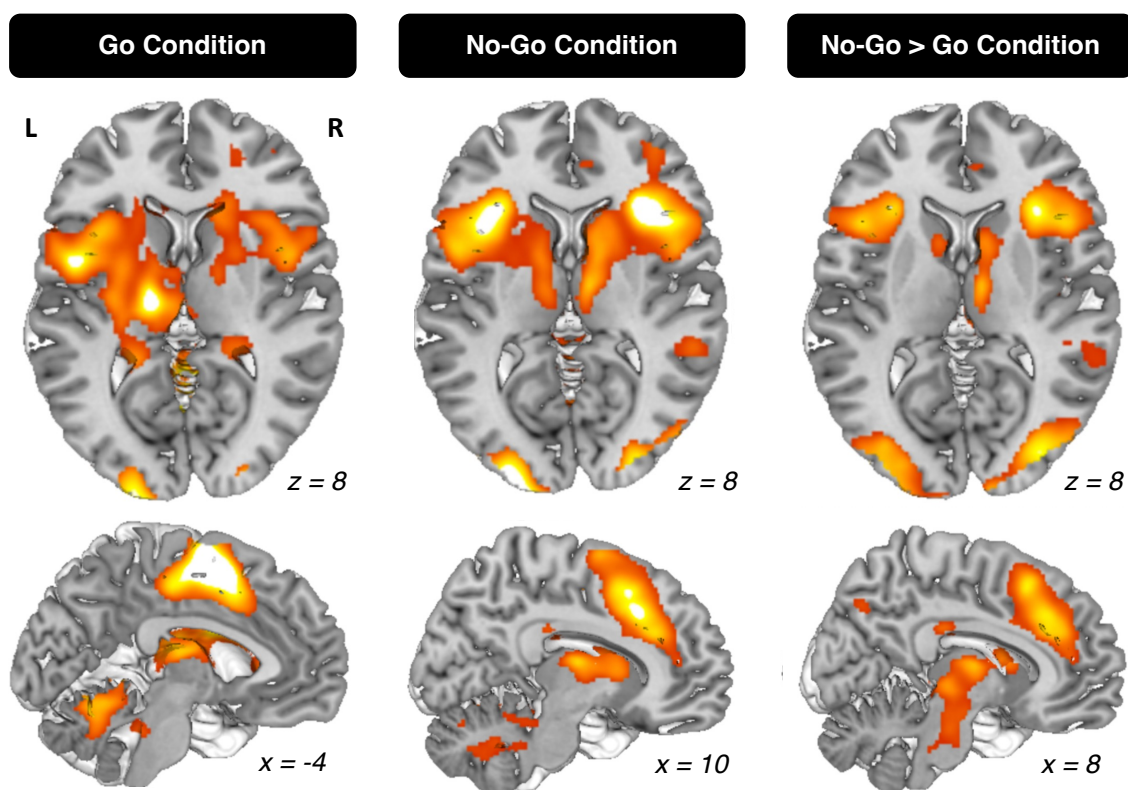

**Figure 2: Activation maps for Go, No-Go, and No-Go > Go Contrasts**

Whole-brain activation maps for the Go, No-Go, and No-Go > Go contrasts in the GNG task (FDR cluster-level correction of  $p < 0.05$ ). Activation was found through whole-brain regression group analyses ( $n = 68$ ). Surface renderings of activation patterns were created in Mango (<http://ric.uthscsa.edu/mango/>) with significant clusters overlaid on Colin27 T1 segmented MNI template. Views shown: superior axial (top) and sagittal right (bottom). L and R represent the left and right sides of the axial surface, respectively. Table 1 provides the full list of activations revealed by each of these contrasts.

#### *Psychosocial Adversity: Childhood PA*

To examine whether greater childhood PA was associated with weaker activation, i.e., negative contrast testing the indirect relationship, whole-brain regressions were run between the activation results from the NGvG contrast and the CPAS subscales and summary scaled score included as covariates. The NGvG contrast was used for these brain-behavior analyses because the activation patterns in this condition represented those that subserved inhibitory control (Simmonds et al., 2008). It was hypothesized that these associations would be greater in subscales related more to deprivation (e.g., neglect, caregiver emotional availability, social isolation).

Greater childhood neglect was associated with weaker NGvG activity in the right posterior cingulate ( $p_{\text{FDR}} = 0.014$ ; peak coordinates:  $x = 1.42$ ,  $y = -61.87$ ,  $z = 12.85$ ;  $k = 515$  voxels). Neither the childhood PA sum score nor any other childhood PA subscale were negatively associated with NGvG activity.

To examine whether greater PA was associated with greater activation, possibly due to compensatory activation patterns as there were no differences in task performance observed, whole-brain regressions were used to test the direct relationship between childhood PA and the NGvG activation through a positive contrast.

Greater childhood family conflict was associated with greater activation in the left medial frontal gyrus extending to the left anterior cingulate ( $p_{\text{FDR}} < 0.001$ ; peak coordinates:  $x = -8.8$ ,  $y = 28.41$ ,  $z = 41.95$ ;  $k = 2068$  voxels), while greater household economic stress was associated with greater activation in the right superior frontal gyrus extending to the right medial frontal gyrus ( $p_{\text{FDR}} = 0.019$ ; peak coordinates:  $x = 9.35$ ,  $y = 1.92$ ,  $z = 62.27$ ;  $k = 601$  voxels). Brain maps depicting surface renderings of the activation present in both the negative and positive contrasts are provided in Figure 3.

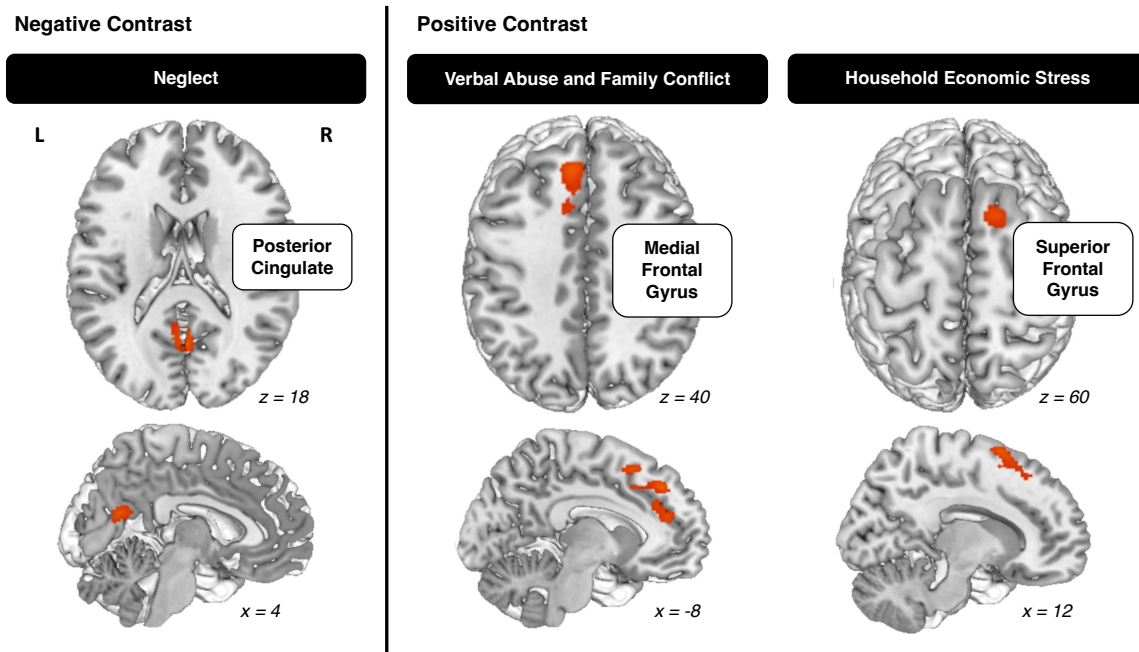

**Figure 3:** Locations of significant whole-brain activation clusters for No-Go > Go contrast (FDR cluster-level correction of  $p < 0.05$ ) with childhood psychosocial adversity measures as covariates for both positive and negative contrasts. Activation was found through whole-brain regression group analyses ( $n = 68$ ). Surface renderings of activation patterns were created in Mango (<http://ric.uthscsa.edu/mango/>) with significant clusters overlaid on Colin27 T1 segmented MNI template. Views shown: superior axial (top) and sagittal right (bottom). L and R represent the left and right sides of the axial surface, respectively.

#### *Psychosocial Adversity: Maternal PA*

Similar to the reasoning used for the childhood PA analyses, whole-brain regressions were run with both negative and positive contrasts between the activation results from the NGvG contrast and the maternal PA questionnaires (i.e., mothers reporting their own experiences of PA) and summary score included as covariates.

For all regression models—the three individual maternal health questionnaires (EPDS, PSS, TS) and summary score, an indirect relationship of activation from the NGvG contrast, where higher maternal PA values correlate with weaker NGvG activity, was not found.

In the positive contrast, significant clusters were found for all covariates, with greater maternal PA assessed through the EPDS and PSS associated with increased activation (EPDS:  $p_{FDR} = 0.001$ ,  $k = 1100$  voxels; PSS:  $p_{FDR} = 0.005$ ,  $k = 765$  voxels) in the left cingulate gyrus extending into the left medial and superior frontal gyri (peak coordinates:  $x = -10.69$ ,  $y = 24.43$ ,  $z = 44.25$ ). Greater TS was associated with increased activation in the right middle frontal gyrus extending into the right cingulate gyrus ( $p_{FDR} = 0.015$ ; peak coordinates:  $x = 37.39$ ,  $y = 11.14$ ,  $z = 43.8$ ;  $k = 665$  voxels), and the overall summary score associated with increased activation in the left medial frontal gyrus extending into the left anterior cingulate ( $p_{FDR} < 0.001$ ; peak coordinates:  $x = -8.8$ ,  $y = 28.41$ ,  $z = 41.95$ ;  $k = 2298$  voxels).

Figure 4 depicts the results and surface renderings of the positive contrast. As there were no significant results from the negative contrast, there are no maps for that contrast.

Positive Contrast

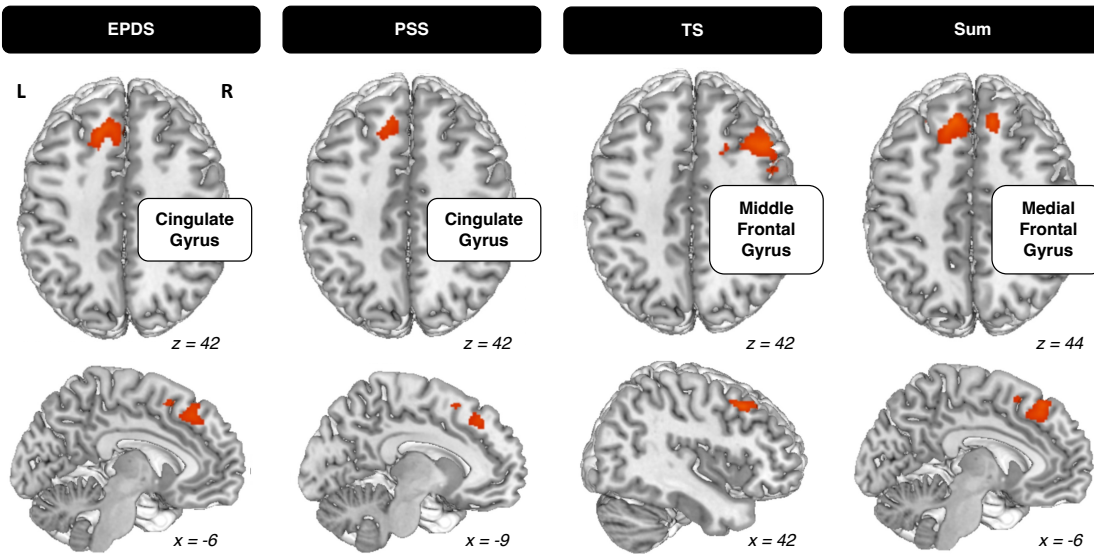

**Figure 4:** Locations of significant whole-brain activation clusters for No-Go > Go contrast (FDR cluster-level correction of  $p < 0.05$ ) with maternal psychosocial adversity measures as covariates in the positive contrast. Activation was found through whole-brain regression group analyses ( $n = 68$ ). Surface renderings of activation patterns were created in Mango (<http://ric.uthscsa.edu/mango/>) with significant clusters overlaid on Colin27 T1 segmented MNI template. Views shown: superior axial (top) and sagittal right (bottom). L and R represent the left and right sides of the axial surface, respectively.

## DISCUSSION

In this study, we investigated the functional neuroanatomy of inhibitory control in children 5 to 7 years of age in a low-resource environment. We then examined their relationship with childhood psychosocial adversity (PA) and maternal PA variables, to determine how different forms of PA could explain the activation patterns we observed. As impairments in executive functioning (EF) have been proposed to serve as a mechanism for the relationship between PA and psychopathology, it was necessary to assess how PA is related to inhibitory control, a form of EF, in this environment. We observed significant activation in the inhibitory control contrast (i.e., NoGo versus Go, NGvG) in the bilateral insula, left declive (vermis), right superior frontal gyrus, bilateral superior temporal gyri, and bilateral caudate. In terms of childhood PA, greater neglect was associated with weaker activation in the right posterior cingulate in the NGvG contrast, while greater family conflict and greater household economic stress were related to increased activation in the left medial and right superior frontal gyri, respectively. For exposure to maternal PA, greater maternal stress and depression were all related to increased activation in the NGvG contrast as measured through the EPDS (left cingulate gyrus), PSS (left cingulate gyrus), and TS (right middle frontal gyrus), as well as a summary score of these measures (left medial frontal gyrus). Overall, different forms of PA were associated with unique activation patterns in the NGvG contrast.

The first aim of this study was to determine the regions underlying inhibitory control in the Go/No-Go (GNG) task in a population of children underrepresented in current literature—children 5 to 7 years of age in a low-resource environment. As much of existing literature on developmental cognitive neuroscience relies on populations from Western, educated, industrialized, rich, and democratic areas, there is lacking socio-demographic diversity that is necessary to identify the complexity involved with environmental factors and their relation to neurodevelopment (Garcini et al., 2022). Assessing whether previous results are generalizable to this new population, allows us to understand the extent to which previous explanations in this subject are applicable.

To our knowledge, this study is novel in its usage of fMRI with children in this age group and resource environment. However, the GNG task has been widely used to measure the neural correlates of inhibitory control. Our findings for the inhibitory control contrast (NGvG) were consistent with previous studies examining older children in high resource environments, with strong activation observed in regions related to inhibitory control, particularly in the prefrontal cortex, including the bilateral superior frontal gyri and caudate extending into the bilateral cingulate gyri and right posterior cingulate (McKenna et al., 2017; Houdé et al., 2010).

Large clusters of activation were also observed in the bilateral insula. While this area is not consistently found to be activated in GNG tasks, it has been cited as active during GNG tasks with older children and adolescents due to greater recruitment of attention-based areas in tasks (Houdé et al., 2010; McKenna et al., 2017). When considering the focal patterns of activation as part of the fronto-parietal network, the insula plays an important role in the ventral attention network (Zhang et al., 2017). Recent research has reported the insula to be a “gatekeeper” to various networks important for EF; more broadly, it has been noted that inhibitory control is a cognitive process that involves the connectivity of various networks rather than those solely in the prefrontal area (Molnar-Szakacs & Uddin, 2022; Zhang et al., 2017). The involvement of the ventral attention network is important to consider for the GNG task specifically, as the No-Go stimulus appears less frequently, and requires both a stimulus-driven behavioral response and an individual’s intention-driven response (Cope et al., 2020). Though our age group is not well represented in the literature, it is reasonable that the increased insula activation observed in older children and adolescents would be even greater in younger children who have less well-defined networks and may require even greater attention in such tasks. Additionally, widespread activation outside of prefrontal areas was a finding consistent with our hypothesis, as the prefrontal cortex continues to develop beyond this age, thus refined networks solely within the prefrontal cortex and nearby areas would not be expected in children of this age (Kolk & Rakic, 2022).



The second aim of this study was to understand the relationship between inhibitory control and childhood PA. On the behavioral level, there were no significant relationships found between task accuracy and presence of PA risks. While studies report mixed results for the behavioral relationship, there is generally an indirect relationship found between inhibitory control and childhood PA (Schäfer et al., 2023). It is possible that as children in our study were found to have similar behavioral performance with differing activation patterns, these changes in activation relate to compensatory strategies, as is discussed further below (Mark et al., 2019; Soloveva et al., 2020).

On the neuroimaging level, significant results were observed when considering the relationship between the childhood PA subscales neglect, family conflict, and household economic stress. We hypothesized that greater childhood PA would be associated with decreased activation in the inhibitory control contrast as previous studies have found decreased activation in the cingulate cortex, middle frontal gyrus, and superior frontal cortex in children with exposure to PA (Bruce et al., 2013; Cará et al., 2019). This hypothesis was supported in the neglect condition, where greater childhood neglect was associated with weaker NGvG activity in the right posterior cingulate. We also hypothesized that in individuals with similar performance, there may be compensatory patterns that relate to increased activation, likely in more posterior areas (Ma et al., 2012; Bruce et al., 2013). For the other significant subscales, greater family conflict and greater household economic stress were associated with increased activation in the medial frontal gyrus (extending to the anterior cingulate) and the superior frontal gyrus (extending to the medial frontal gyrus), respectively. While the posterior cingulate is involved in attention, the medial frontal gyrus, anterior cingulate, and superior frontal gyrus are more directly involved with inhibitory control and decision making (Leech & Sharp, 2014; Talati & Hirsch, 2005; Friedman & Robbins, 2022; du Boisgueheneuc et al., 2006).

There are two possible explanations for these differences in activation patterns according to their related subscales. First, when considering the areas of activation, children with greater

childhood PA had increased activation in areas more directly related to inhibitory control (e.g., medial frontal gyrus) and decreased activation in areas less directly related to inhibitory control (posterior cingulate). As previously established, inhibitory control is dependent on the interplay between different networks. Considering there was no significant difference in behavioral performance between these individuals, observing increased activation reflects a form of inefficient recruitment of regions, and may be indicative of modified baselines of activation for substrates of inhibitory control (Farah et al., 2020; Lesnik, 2007; Mark et al., 2019). Some researchers note recruitment of alternate networks/regions to maintain performance while others have found that greater compensatory activation does not necessarily only involve posterior/alternate areas, and can also include task-relevant areas as a result of the greater mental effort required during difficult tasks (Barulli & Stern, 2013; Naccarato et al., 2006; Soloveva et al., 2020). When considering how areas active as part of the fronto-parietal network relating more to decision-making were more active, these activation patterns may be considered a form of compensation.

Another explanation utilizes the deprivation and threat model to understand the impacts of distinct forms of early adversity. While children in areas of high PA frequently have various forms of adversity co-occur, if these aspects are examined separately—between PA factors that relate to deprivation (absence of factors expected for healthy child development) and threat (presence of factors that negatively impact child development)—then unique effects of neurodevelopment can be identified (McLaughlin et al., 2014). When considering childhood adversity related to inhibitory control, deprivation has been reported to have a greater in magnitude reduction in inhibitory control than threat (Johnson et al., 2021). Neglect has commonly been studied as a measure of deprivation, associated with impairments in inhibitory control behaviorally, and with decreased activation in brain networks as a result of the absence of caregiving inputs that traditionally aid in social and cognitive development (Johnson et al., 2021; McLaughlin, 2016). While multiple subscales collected for childhood PA could be categorized as

deprivation (neglect, caregiver emotional availability, social isolation), the neglect subscale was the only one identified to have this relationship. For those related to threat (harsh discipline and abuse, physical intimate partner violence, maternal depression, family conflict, household economic stress, community adversity), two subscales were related to increased activation. Threat typically has a larger role related to emotional/stress processing with the hypothalamic-pituitary-adrenal axis and cortisol release, but can also be associated with reduced EF and brain activation due to its relationship with prefrontal cortical circuitry, albeit to a lesser extent than with deprivation (McLaughlin, 2016; Ivy et al., 2010; Merz et al., 2023). The increased activation in task-relevant areas observed in our sample for the threat-related subscales is not reflective of improved EF in these children and can be interpreted as a different presentation of affected patterns of neural networks (Johnson et al., 2021).

As previous research has explored the relationship between the number of adverse childhood experiences (ACEs) related to impacts on EF (e.g., cumulative impact model of ACEs), it was hypothesized that children with greater PA, as measured through the summary score of childhood PA values, would be strongly associated with behavioral and activation differences (McLaughlin et al., 2014). However, in our sample, this was not observed. This absence of finding emphasizes the importance of considering how different types of adversity manifest, rather than relying on a combinatory value, especially as existing literature has found adverse factors related to low-resource environments (neighborhood poverty, lower family income) likely to directly impact brain activation patterns related to inhibitory control, which is associated with psychopathology later in life (Taylor & Barch, 2022; Tomasi & Volkow, 2023; Tomlinson et al., 2020).

The final aim of the study was to determine how maternal PA relates to children's inhibitory control behaviorally and through neuroimaging. Previous literature has observed maternal depressive symptoms experienced during early childhood to predict the child's EF difficulties at later ages, including deficits in inhibitory control (Baker & Kuhn, 2018; Hughes et al., 2013; Wang

& Dix, 2017). In our sample, similar to with childhood PA measures, there was no significant relationship exhibited between GNG task accuracy and maternal PA variables.

From a neuroimaging perspective, no significant results were observed when considering the inverse relationship between inhibitory control activation and maternal PA. When considering the direct relationship between inhibitory control activation and maternal PA, greater maternal PA assessed through the EPDS, PSS, TS, and the summary score, were all associated with increased activation in the cingulate gyrus, middle frontal gyrus, and medial frontal gyrus. It is challenging to integrate these findings with previous literature, as there have been mixed results related to the relationship between maternal PA and inhibitory control. For example, while Farah et al. (2020) observed that children with higher maternal PA have decreased functional connectivity between areas related to imagination and auditory processing, Demir-Lira et al. (2016) found greater regional homogeneity in resting-state fMRI in the left prefrontal cortex in young children with higher early life stress. Meanwhile, Pozzi et al. (2021) reported no association between negative maternal behavior and differences in functional connectivity patterns in children. As all maternal PA variables were associated with increased activation in areas directly related to the inhibitory control task, this is possible to be explained with what some researchers predict in relation to compensation, as there was diffuse increased activation resulting in the maintenance of behavioral performance (Naccarato et al., 2006; Soloveva et al., 2020). Contextualizing these measures within the deprivation and threat model is also difficult as maternal stress and depression involve both threat and deprivation effects, as they not only involve the addition of stress—a negative environmental factor (threat)—but also lead to less warm and responsive parenting behaviors for the child (deprivation) (Henry et al., 2020). Regardless, the presence of increased activation reflects neural correlates of inhibitory control that differ from previous literature, again highlighting the use of varied recruitment of brain regions for inhibitory control in this novel population.

## Limitations

Though this study successfully employed neuroimaging techniques to examine the relationship between PA and children's inhibitory control, there were some limitations. First, as these techniques relied on assessing this relationship through correlational analyses, no information regarding the causality of this mechanism can be stated. Regarding the PA behavioral assessments, though the assessments were adapted to a Bangladeshi context, it is possible that these measures were not fully comprehensive to assess PA and outcomes in this sample. These measures also solely assessed negative psychosocial factors and did not assess the prevalence of protective factors that may have allowed for resiliency within this population. Additionally, while the GNG task utilized in this study has been widely used in conjunction with neuroimaging tools to inform of the neural correlates of inhibitory control, it is possible that this task may not have been sensitive enough to detect individual behavioral variance related to performance in this environment. However, in a previous study that utilized a separate sample from the BEAN project, Sullivan et al. (2022) found behavioral differences between participants, which indicates that the behavioral results in the present study are likely reflective of the true behavioral variance. Finally, as there was no middle or high resource group from Bangladesh to compare the children in our sample to, it is difficult to know whether the differences observed in the activation patterns, as well as the diffuse clusters, would also be revealed in other groups living in this area. Despite these limitations, examining brain function underlying GNG in children growing up in a low-resource environment contributes to a more comprehensive image of the neural activation patterns present in the development of inhibitory control.

## Conclusion

In conclusion, this study presents results from neuroimaging data that explores the relationship and identifies the neural correlates of inhibitory control and PA in children within a low-resource environment, providing greater cultural and contextual diversity to this subject area.

Results indicate decreased activation related to childhood neglect and increased activation related to greater childhood, household, and maternal stress and depression. These results are reflective of modified neural substrates for inhibitory control and align with proposed explanations of compensatory mechanisms and differences in effects between threat and deprivation adverse factors. The results emphasize the importance of conducting research in low-resource environments to successfully identify how inhibitory control may serve as a mechanism for the relationship between early life adversity and psychopathology. Future studies should work to assess older children as well as adults in similar low-resource environments, through both cross-sectional and longitudinal methods, to establish typical and atypical inhibitory control activation patterns in these areas. As this present study has shown measures of PA relate to differences in inhibitory control activation patterns, future studies could utilize interventions that work to minimize PA and see if there are observable impacts in the regions underlying inhibitory control, and for which early years the brain is most amenable to restoring impaired EF.

**Acknowledgements:** We are grateful to all the children and caregivers who participated in the Bangladesh Early Adversity Neuroimaging Project and to our dedicated lab staff in Dhaka. We thank the NINSH facility, Dr. Kazi Deen Mohammad, and radiology technicians Mehdi and Samad for accommodating our research. We are extremely appreciative of Amala Someshwar, Akshar Patel, Rachel Kwon, and Sarala Tiwari, for their coordination and management of the study.

This work was supported by research grants from the Bill & Melinda Gates Foundation to CA Nelson [OPP1111625] and WA Petri [OPP1017093], from the Henske Foundation to WA Petri, from NIAID to WA Petri (R01 AI043596-17), from the Harvard Brain Initiative Transitions Program to TK Turesky, and from the Harvard College Research Program to ZS Surani.

**Declarations of interest:** None

## REFERENCES

- Augusti E.-M., & Melinder A. (2013). Maltreatment Is Associated With Specific Impairments in Executive Functions: A Pilot Study. *Journal of Traumatic Stress, 26*(6), 780–783.  
<https://doi.org/10.1002/jts.21860>
- Baker, C., & Kuhn, L. (2018). Mediated pathways from maternal depression and early parenting to children’s executive function and externalizing behaviour problems. *Infant and Child Development, 27*(1), e2052. <https://doi.org/10.1002/icd.2052>
- Barulli, D., & Stern, Y. (2013). Efficiency, capacity, compensation, maintenance, plasticity: Emerging concepts in cognitive reserve. *Trends in Cognitive Sciences, 17*(10), 502–509.  
<https://doi.org/10.1016/j.tics.2013.08.012>
- Berens, A. E., Kumar, S., Tofail, F., Jensen, S. K. G., Alam, M., Haque, R., Kakon, S. H., Petri, W. A., & Nelson, C. A. (2019). Cumulative psychosocial risk and early child development: Validation and use of the Childhood Psychosocial Adversity Scale in global health research. *Pediatric Research, 86*(6), Article 6.  
<https://doi.org/10.1038/s41390-019-0431-7>
- Bernier, A., Carlson, S. M., & Whipple, N. (2010). From External Regulation to Self-Regulation: Early Parenting Precursors of Young Children’s Executive Functioning. *Child Development, 81*(1), 326–339. <https://doi.org/10.1111/j.1467-8624.2009.01397.x>
- Bick, J., & Nelson, C. A. (2016). Early Adverse Experiences and the Developing Brain. *Neuropsychopharmacology: Official Publication of the American College of Neuropsychopharmacology, 41*(1), 177–196. <https://doi.org/10.1038/npp.2015.252>
- Bruce, J., Fisher, P. A., Graham, A. M., Moore, W. E., Peake, S. J., & Mannering, A. M. (2013). Patterns of Brain Activation in Foster Children and Nonmaltreated Children During an Inhibitory Control Task. *Development and Psychopathology, 25*(4 0 1), 10.1017/S095457941300028X. <https://doi.org/10.1017/S095457941300028X>

- Bunge, S. A., Dudukovic, N. M., Thomason, M. E., Vaidya, C. J., & Gabrieli, J. D. E. (2002). Immature frontal lobe contributions to cognitive control in children: Evidence from fMRI. *Neuron*, 33(2), 301–311. [https://doi.org/10.1016/s0896-6273\(01\)00583-9](https://doi.org/10.1016/s0896-6273(01)00583-9)
- Cará, V. M., Esper, N. B., de Azeredo, L. A., Lochpe, V., Dalfovo, N. P., Santos, R. C., Sanvicente-Vieira, B., Grassi-Oliveira, R., Franco, A. R., & Buchweitz, A. (2019). An fMRI study of inhibitory control and the effects of exposure to violence in Latin-American early adolescents: Alterations in frontoparietal activation and performance. *Social Cognitive and Affective Neuroscience*, 14(10), 1097–1107. <https://doi.org/10.1093/scan/nsz092>
- Carvalho, J. N., Renner, A. M., Donat, J. C., de Moura, T. C., Fonseca, R. P., & Kristensen, C. H. (2020). Executive functions and clinical symptoms in children exposed to maltreatment. *Applied Neuropsychology. Child*, 9(1), 1–12. <https://doi.org/10.1080/21622965.2018.1497989>
- Casey, B. J., Castellanos, F. X., Giedd, J. N., Marsh, W. L., Hamburger, S. D., Schubert, A. B., Vauss, Y. C., Vaituzis, A. C., Dickstein, D. P., Sarfatti, S. E., & Rapoport, J. L. (1997). Implication of right frontostriatal circuitry in response inhibition and attention-deficit/hyperactivity disorder. *Journal of the American Academy of Child and Adolescent Psychiatry*, 36(3), 374–383. <https://doi.org/10.1097/00004583-199703000-00016>
- Cohen, S., Kamarck, T., & Mermelstein, R. (1983). A Global Measure of Perceived Stress. *Journal of Health and Social Behavior*, 24(4), 385–396. <https://doi.org/10.2307/2136404>
- Cope, L. M., Hardee, J. E., Martz, M. E., Zucker, R. A., Nichols, T. E., & Heitzeg, M. M. (2020). Developmental maturation of inhibitory control circuitry in a high-risk sample: A longitudinal fMRI study. *Developmental Cognitive Neuroscience*, 43, 100781. <https://doi.org/10.1016/j.dcn.2020.100781>



- Cragg, L., & Nation, K. (2008). Go or no-go? Developmental improvements in the efficiency of response inhibition in mid-childhood. *Developmental Science*, *11*(6), 819–827.  
<https://doi.org/10.1111/j.1467-7687.2008.00730.x>
- Demir-Lira, Ö. E., Voss, J. L., O’Neil, J. T., Briggs-Gowan, M. J., Wakschlag, L. S., & Booth, J. R. (2016). Early-life stress exposure associated with altered prefrontal resting-state fMRI connectivity in young children. *Developmental Cognitive Neuroscience*, *19*, 107–114.  
<https://doi.org/10.1016/j.dcn.2016.02.003>
- Diamond, A. (2013). Executive functions. *Annual Review of Psychology*, *64*, 135–168.  
<https://doi.org/10.1146/annurev-psych-113011-143750>
- du Boisgueheneuc, F., Levy, R., Volle, E., Seassau, M., Duffau, H., Kinkingnehun, S., Samson, Y., Zhang, S., & Dubois, B. (2006). Functions of the left superior frontal gyrus in humans: A lesion study. *Brain: A Journal of Neurology*, *129*(Pt 12), 3315–3328.  
<https://doi.org/10.1093/brain/awl244>
- El-Khodary, B., & Samara, M. (2020). The relationship between multiple exposures to violence and war trauma, and mental health and behavioural problems among Palestinian children and adolescents. *European Child & Adolescent Psychiatry*, *29*.  
<https://doi.org/10.1007/s00787-019-01376-8>
- Farah, R., Greenwood, P., Dudley, J., Hutton, J., Ammerman, R. T., Phelan, K., Holland, S., & Horowitz-Kraus, T. (2020). Maternal depression is associated with altered functional connectivity between neural circuits related to visual, auditory, and cognitive processing during stories listening in preschoolers. *Behavioral and Brain Functions: BBF*, *16*, 5.  
<https://doi.org/10.1186/s12993-020-00167-5>
- Felitti, V. J., Anda, R. F., Nordenberg, D., Williamson, D. F., Spitz, A. M., Edwards, V., Koss, M. P., & Marks, J. S. (1998). Relationship of childhood abuse and household dysfunction to many of the leading causes of death in adults. The Adverse Childhood Experiences

(ACE) Study. *American Journal of Preventive Medicine*, 14(4), 245–258.

[https://doi.org/10.1016/s0749-3797\(98\)00017-8](https://doi.org/10.1016/s0749-3797(98)00017-8)

Friedman, N. P., & Robbins, T. W. (2022). The role of prefrontal cortex in cognitive control and executive function. *Neuropsychopharmacology*, 47(1), Article 1.

<https://doi.org/10.1038/s41386-021-01132-0>

Garcini, L. M., Arredondo, M. M., Berry, O., Church, J. A., Fryberg, S., Thomason, M. E., & McLaughlin, K. A. (2022). Increasing diversity in developmental cognitive neuroscience: A roadmap for increasing representation in pediatric neuroimaging research. *Developmental Cognitive Neuroscience*, 58, 101167.

<https://doi.org/10.1016/j.dcn.2022.101167>

Gausia, K., Fisher, C., Algin, S., & Oosthuizen, J. (2007). Validation of the Bangla version of the Edinburgh Postnatal Depression Scale for a Bangladeshi sample. *Journal of Reproductive and Infant Psychology*, 25(4), 308–315.

<https://doi.org/10.1080/02646830701644896>

Gonzalez, A., Jenkins, J. M., Steiner, M., & Fleming, A. S. (2012). Maternal Early Life Experiences and Parenting: The Mediating Role of Cortisol and Executive Function. *Journal of the American Academy of Child & Adolescent Psychiatry*, 51(7), 673–682.

<https://doi.org/10.1016/j.jaac.2012.04.003>

Henry, L. M., Steele, E. H., Watson, K. H., Bettis, A. H., Gruhn, M., Dunbar, J., Reising, M., & Compas, B. E. (2020). Stress Exposure and Maternal Depression as Risk Factors for Symptoms of Anxiety and Depression in Adolescents. *Child Psychiatry & Human Development*, 51(4), 572–584. <https://doi.org/10.1007/s10578-019-00940-2>

Hildyard, K. L., & Wolfe, D. A. (2002). Child neglect: Developmental issues and outcomes☆.

*Child Abuse & Neglect*, 26(6), 679–695. [https://doi.org/10.1016/S0145-2134\(02\)00341-1](https://doi.org/10.1016/S0145-2134(02)00341-1)

- Houdé, O., Rossi, S., Lubin, A., & Joliot, M. (2010). Mapping numerical processing, reading, and executive functions in the developing brain: An fMRI meta-analysis of 52 studies including 842 children. *Developmental Science*, *13*(6), 876–885.  
<https://doi.org/10.1111/j.1467-7687.2009.00938.x>
- Hughes, C., Roman, G., Hart, M. J., & Ensor, R. (2013). Does maternal depression predict young children's executive function? – A 4-year longitudinal study. *Journal of Child Psychology and Psychiatry*, *54*(2), 169–177. <https://doi.org/10.1111/jcpp.12014>
- Ivy, A. S., Rex, C. S., Chen, Y., Dubé, C., Maras, P. M., Grigoriadis, D. E., Gall, C. M., Lynch, G., & Baram, T. Z. (2010). Hippocampal dysfunction and cognitive impairments provoked by chronic early-life stress involve excessive activation of CRH receptors. *The Journal of Neuroscience: The Official Journal of the Society for Neuroscience*, *30*(39), 13005–13015. <https://doi.org/10.1523/JNEUROSCI.1784-10.2010>
- Jankowski, K. F., Bruce, J., Beauchamp, K. G., Roos, L. E., Moore, W. E., & Fisher, P. A. (2017). Preliminary Evidence of the Impact of Early Childhood Maltreatment and a Preventive Intervention on Neural Patterns of Response Inhibition in Early Adolescence. *Developmental Science*, *20*(4), 10.1111/desc.12413. <https://doi.org/10.1111/desc.12413>
- Jensen, S. K. G., Tofail, F., Haque, R., Jr, W. A. P., & Ili, C. A. N. (2019). Child development in the context of biological and psychosocial hazards among poor families in Bangladesh. *PLOS ONE*, *14*(5), e0215304. <https://doi.org/10.1371/journal.pone.0215304>
- Johnson, D., Policelli, J., Li, M., Dharamsi, A., Hu, Q., Sheridan, M. A., McLaughlin, K. A., & Wade, M. (2021). Associations of Early-Life Threat and Deprivation With Executive Functioning in Childhood and Adolescence: A Systematic Review and Meta-analysis. *JAMA Pediatrics*, *175*(11), e212511. <https://doi.org/10.1001/jamapediatrics.2021.2511>
- Kang, W., Hernández, S. P., Rahman, Md. S., Voigt, K., & Malvaso, A. (2022). Inhibitory Control Development: A Network Neuroscience Perspective. *Frontiers in Psychology*, *13*.  
<https://www.frontiersin.org/articles/10.3389/fpsyg.2022.651547>

- Karasz, A., Patel, V., Kabita, M., & Shimu, P. (2013). "Tension" in South Asian women: Developing a measure of common mental disorder using participatory methods. *Progress in Community Health Partnerships: Research, Education, and Action*, 7(4), 429–441. <https://doi.org/10.1353/cpr.2013.0046>
- Kolk, S. M., & Rakic, P. (2022). Development of prefrontal cortex. *Neuropsychopharmacology: Official Publication of the American College of Neuropsychopharmacology*, 47(1), 41–57. <https://doi.org/10.1038/s41386-021-01137-9>
- Kraaijevanger, E. J., Pollok, T. M., Monninger, M., Kaiser, A., Brandeis, D., Banaschewski, T., & Holz, N. E. (2020). Impact of early life adversities on human brain functioning: A coordinate-based meta-analysis. *Neuroscience & Biobehavioral Reviews*, 113, 62–76. <https://doi.org/10.1016/j.neubiorev.2020.03.008>
- Lancaster, J. L., Tordesillas-Gutiérrez, D., Martínez, M., Salinas, F., Evans, A., Zilles, K., Mazziotta, J. C., & Fox, P. T. (2007). Bias between MNI and Talairach coordinates analyzed using the ICBM-152 brain template. *Human Brain Mapping*, 28(11), 1194–1205. <https://doi.org/10.1002/hbm.20345>
- Langer, N., Benjamin, C., Becker, B. L. C., & Gaab, N. (2019). Comorbidity of reading disabilities and ADHD: Structural and functional brain characteristics. *Human Brain Mapping*, 40(9), 2677–2698. <https://doi.org/10.1002/hbm.24552>
- Lansford, J. E., Dodge, K. A., Pettit, G. S., Bates, J. E., Crozier, J., & Kaplow, J. (2002). A 12-year prospective study of the long-term effects of early child physical maltreatment on psychological, behavioral, and academic problems in adolescence. *Archives of Pediatrics & Adolescent Medicine*, 156(8), 824–830. <https://doi.org/10.1001/archpedi.156.8.824>
- Lee, H. W., Lo, Y.-H., Li, K.-H., Sung, W.-S., & Juan, C.-H. (2015). The relationship between the development of response inhibition and intelligence in preschool children. *Frontiers in Psychology*, 6, 802. <https://doi.org/10.3389/fpsyg.2015.00802>

- Leech, R., & Sharp, D. J. (2014). The role of the posterior cingulate cortex in cognition and disease. *Brain: A Journal of Neurology*, 137(Pt 1), 12–32.  
<https://doi.org/10.1093/brain/awt162>
- Lesnik, P. (2007). *A developmental event -related fMRI study of inhibition using a go /no -go task* [The University of New Mexico]. <https://www.proquest.com/docview/304842078?pq-origsite=gscholar&fromopenview=true&sourcetype=Dissertations%20&%20Theses>
- Liu, Q., Zhu, X., Ziegler, A., & Shi, J. (2015). The effects of inhibitory control training for preschoolers on reasoning ability and neural activity. *Scientific Reports*, 5(1), Article 1.  
<https://doi.org/10.1038/srep14200>
- Lund, J. I., Toombs, E., Radford, A., Boles, K., & Mushquash, C. (2020). Adverse Childhood Experiences and Executive Function Difficulties in Children: A Systematic Review. *Child Abuse & Neglect*, 106, 104485. <https://doi.org/10.1016/j.chiabu.2020.104485>
- Ma, J., Lei, D., Jin, X., Du, X., Jiang, F., Li, F., Zhang, Y., & Shen, X. (2012). Compensatory brain activation in children with attention deficit/hyperactivity disorder during a simplified Go/No-go task. *Journal of Neural Transmission*, 119(5), 613–619.  
<https://doi.org/10.1007/s00702-011-0744-0>
- Madigan, S., Deneault, A.-A., Racine, N., Park, J., Thiemann, R., Zhu, J., Dimitropoulos, G., Williamson, T., Fearon, P., Cénat, J. M., McDonald, S., Devereux, C., & Neville, R. D. (2023). Adverse childhood experiences: A meta-analysis of prevalence and moderators among half a million adults in 206 studies. *World Psychiatry: Official Journal of the World Psychiatric Association (WPA)*, 22(3), 463–471. <https://doi.org/10.1002/wps.21122>
- Mann, T. D., Hund, A. M., Hesson-McInnis, M. S., & Roman, Z. J. (2017). Pathways to School Readiness: Executive Functioning Predicts Academic and Social–Emotional Aspects of School Readiness. *Mind, Brain, and Education*, 11(1), 21–31.  
<https://doi.org/10.1111/mbe.12134>

- Mark, C. A., Poltavski, D. V., Petros, T., & King, A. (2019). Differential executive functioning in young adulthood as a function of experienced child abuse. *International Journal of Psychophysiology: Official Journal of the International Organization of Psychophysiology*, *135*, 126–135. <https://doi.org/10.1016/j.ijpsycho.2018.12.004>
- McKenna, R., Rushe, T., & Woodcock, K. A. (2017). Informing the Structure of Executive Function in Children: A Meta-Analysis of Functional Neuroimaging Data. *Frontiers in Human Neuroscience*, *11*, 154. <https://doi.org/10.3389/fnhum.2017.00154>
- McLaughlin, K. A. (2016). Future Directions in Childhood Adversity and Youth Psychopathology. *Journal of Clinical Child & Adolescent Psychology*, *45*(3), 361–382. <https://doi.org/10.1080/15374416.2015.1110823>
- McLaughlin, K. A., Sheridan, M. A., & Lambert, H. K. (2014). Childhood adversity and neural development: Deprivation and threat as distinct dimensions of early experience. *Neuroscience and Biobehavioral Reviews*, *47*, 578–591. <https://doi.org/10.1016/j.neubiorev.2014.10.012>
- Merz, E. C., Myers, B., Hansen, M., Simon, K. R., Strack, J., & Noble, K. G. (2023). Socioeconomic Disparities in Hypothalamic-Pituitary-Adrenal Axis Regulation and Prefrontal Cortical Structure. *Biological Psychiatry Global Open Science*, *4*(1), 83–96. <https://doi.org/10.1016/j.bpsgos.2023.10.004>
- Molnar-Szakacs, I., & Uddin, L. Q. (2022). Anterior insula as a gatekeeper of executive control. *Neuroscience and Biobehavioral Reviews*, *139*, 104736. <https://doi.org/10.1016/j.neubiorev.2022.104736>
- Naccarato, M., Calautti, C., Jones, P. S., Day, D. J., Carpenter, T. A., & Baron, J.-C. (2006). Does healthy aging affect the hemispheric activation balance during paced index-to-thumb opposition task? An fMRI study. *NeuroImage*, *32*(3), 1250–1256. <https://doi.org/10.1016/j.neuroimage.2006.05.003>

- Pechtel, P., & Pizzagalli, D. A. (2011). Effects of early life stress on cognitive and affective function: An integrated review of human literature. *Psychopharmacology*, *214*(1), 55–70. <https://doi.org/10.1007/s00213-010-2009-2>
- Perone, S., Almy, B., & Zelazo, P. D. (2018). Chapter 11—Toward an Understanding of the Neural Basis of Executive Function Development. In R. Gibb & B. Kolb (Eds.), *The Neurobiology of Brain and Behavioral Development* (pp. 291–314). Academic Press. <https://doi.org/10.1016/B978-0-12-804036-2.00011-X>
- Pozzi, E., Vijayakumar, N., Byrne, M. L., Bray, K. O., Seal, M., Richmond, S., Zalesky, A., & Whittle, S. L. (2021). Maternal parenting behavior and functional connectivity development in children: A longitudinal fMRI study. *Developmental Cognitive Neuroscience*, *48*, 100946. <https://doi.org/10.1016/j.dcn.2021.100946>
- Rubia, K., Smith, A. B., Brammer, M. J., & Taylor, E. (2003). Right inferior prefrontal cortex mediates response inhibition while mesial prefrontal cortex is responsible for error detection. *NeuroImage*, *20*(1), 351–358. [https://doi.org/10.1016/s1053-8119\(03\)00275-1](https://doi.org/10.1016/s1053-8119(03)00275-1)
- Saridjan, N. S., Huizink, A. C., Koetsier, J. A., Jaddoe, V. W., Mackenbach, J. P., Hofman, A., Kirschbaum, C., Verhulst, F. C., & Tiemeier, H. (2010). Do social disadvantage and early family adversity affect the diurnal cortisol rhythm in infants? The Generation R Study. *Hormones and Behavior*, *57*(2), 247–254. <https://doi.org/10.1016/j.yhbeh.2009.12.001>
- Schäfer, J. L., McLaughlin, K. A., Manfro, G. G., Pan, P., Rohde, L. A., Miguel, E. C., Simioni, A., Hoffmann, M. S., & Salum, G. A. (2023). Threat and deprivation are associated with distinct aspects of cognition, emotional processing, and psychopathology in children and adolescents. *Developmental Science*, *26*(1), e13267. <https://doi.org/10.1111/desc.13267>
- Sheridan, M. A., Fox, N. A., Zeanah, C. H., McLaughlin, K. A., & Nelson, C. A. (2012). Variation in neural development as a result of exposure to institutionalization early in childhood. *Proceedings of the National Academy of Sciences of the United States of America*, *109*(32), 12927–12932. <https://doi.org/10.1073/pnas.1200041109>

- Simmonds, D. J., Pekar, J. J., & Mostofsky, S. H. (2008). Meta-analysis of Go/No-go tasks demonstrating that fMRI activation associated with response inhibition is task-dependent. *Neuropsychologia*, *46*(1), 224–232.  
<https://doi.org/10.1016/j.neuropsychologia.2007.07.015>
- Soloveva, M. V., Jamadar, S. D., Velakoulis, D., Poudel, G., & Georgiou-Karistianis, N. (2020). Brain compensation during visuospatial working memory in premanifest Huntington's disease. *Neuropsychologia*, *136*, 107262.  
<https://doi.org/10.1016/j.neuropsychologia.2019.107262>
- Sullivan, E. F., Xie, W., Conte, S., Richards, J. E., Shama, T., Haque, R., Petri, W. A., & Nelson, C. A. (2022). Neural correlates of inhibitory control and associations with cognitive outcomes in Bangladeshi children exposed to early adversities. *Developmental Science*, *25*(5), e13245. <https://doi.org/10.1111/desc.13245>
- Talairach, J., Tournoux, P., & Musolino, A. (1988). Anatomical Stereotaxic Studies of the Frontal-Lobe in the Management of the Epilepsies. *EPILEPSIA*, *29*(2), 205–205.
- Talati, A., & Hirsch, J. (2005). Functional specialization within the medial frontal gyrus for perceptual go/no-go decisions based on “what,” “when,” and “where” related information: An fMRI study. *Journal of Cognitive Neuroscience*, *17*(7), 981–993.  
<https://doi.org/10.1162/0898929054475226>
- Tamm, L., Menon, V., & Reiss, A. L. (2002). Maturation of Brain Function Associated With Response Inhibition. *Journal of the American Academy of Child & Adolescent Psychiatry*, *41*(10), 1231–1238. <https://doi.org/10.1097/00004583-200210000-00013>
- Taylor, R. L., & Barch, D. M. (2022). Inhibitory control within the context of early life poverty and implications for outcomes. *Neuroscience and Biobehavioral Reviews*, *140*, 104778.  
<https://doi.org/10.1016/j.neubiorev.2022.104778>
- Teicher, M. H., Andersen, S. L., Polcari, A., Anderson, C. M., Navalta, C. P., & Kim, D. M. (2003). The neurobiological consequences of early stress and childhood maltreatment.



*Neuroscience and Biobehavioral Reviews*, 27(1–2), 33–44.

[https://doi.org/10.1016/s0149-7634\(03\)00007-1](https://doi.org/10.1016/s0149-7634(03)00007-1)

Tomasi, D., & Volkow, N. D. (2023). Effects of family income on brain functional connectivity in US children: Associations with cognition. *Molecular Psychiatry*.

<https://doi.org/10.1038/s41380-023-02222-9>

Tomlinson, R. C., Burt, S. A., Waller, R., Jonides, J., Miller, A. L., Gearhardt, A. N., Peltier, S. J., Klump, K. L., Lumeng, J. C., & Hyde, L. W. (2020). Neighborhood poverty predicts altered neural and behavioral response inhibition. *NeuroImage*, 209, 116536.

<https://doi.org/10.1016/j.neuroimage.2020.116536>

Torpey, D. C., Hajcak, G., Kim, J., Kujawa, A., & Klein, D. N. (2012). Electrocortical and behavioral measures of response monitoring in young children during a Go/No-Go task. *Developmental Psychobiology*, 54(2), 139–150. <https://doi.org/10.1002/dev.20590>

Turesky, T. K., Jensen, S. K. G., Yu, X., Kumar, S., Wang, Y., Sliva, D. D., Gagoski, B., Sanfilippo, J., Zöllei, L., Boyd, E., Haque, R., Hafiz Kakon, S., Islam, N., Petri Jr, W. A., Nelson, C. A., & Gaab, N. (2019). The relationship between biological and psychosocial risk factors and resting-state functional connectivity in 2-month-old Bangladeshi infants: A feasibility and pilot study. *Developmental Science*, 22(5), e12841.

<https://doi.org/10.1111/desc.12841>

Turesky, T. K., Shama, T., Kakon, S. H., Haque, R., Islam, N., Someshwar, A., Gagoski, B., Petri, W. A., Nelson, C. A., & Gaab, N. (2021). Brain morphometry and diminished physical growth in Bangladeshi children growing up in extreme poverty: A longitudinal study. *Developmental Cognitive Neuroscience*, 52, 101029.

<https://doi.org/10.1016/j.dcn.2021.101029>

van Marle, H. J. F., Hermans, E. J., Qin, S., & Fernández, G. (2009). From specificity to sensitivity: How acute stress affects amygdala processing of biologically salient stimuli. *Biological Psychiatry*, 66(7), 649–655. <https://doi.org/10.1016/j.biopsych.2009.05.014>

- Wang, Y., & Dix, T. (2017). Mothers' depressive symptoms and children's externalizing behavior: Children's negative emotionality in the development of hostile attributions. *Journal of Family Psychology: JFP: Journal of the Division of Family Psychology of the American Psychological Association (Division 43)*, 31(2), 214–223.  
<https://doi.org/10.1037/fam0000241>
- Wu, J., Liu, Y., Fang, H., Qin, S., Kohn, N., & Duan, H. (2021). The relationship between childhood stress and distinct stages of dynamic behavior monitoring in adults: Neural and behavioral correlates. *Social Cognitive and Affective Neuroscience*, 16(9), 937–949.  
<https://doi.org/10.1093/scan/nsab041>
- Xu, P., Wu, D., Chen, Y., Wang, Z., & Xiao, W. (2020). The Effect of Response Inhibition Training on Risky Decision-Making Task Performance. *Frontiers in Psychology*, 11, 1806. <https://doi.org/10.3389/fpsyg.2020.01806>
- You, S., & Lim, S. A. (2015). Development pathways from abusive parenting to delinquency: The mediating role of depression and aggression. *Child Abuse & Neglect*, 46, 152–162.  
<https://doi.org/10.1016/j.chiabu.2015.05.009>
- Zelazo, P. D. (2020). Executive Function and Psychopathology: A Neurodevelopmental Perspective. *Annual Review of Clinical Psychology*, 16(1), 431–454.  
<https://doi.org/10.1146/annurev-clinpsy-072319-024242>
- Zhang, R., Geng, X., & Lee, T. M. C. (2017). Large-scale functional neural network correlates of response inhibition: An fMRI meta-analysis. *Brain Structure and Function*, 222(9), 3973–3990. <https://doi.org/10.1007/s00429-017-1443-x>
